# Supplementary material for: Growth and Characteristics of Two Different Epichloë sinensis Strains Under Different Cultures
Source: Front Microbiol. 2021 Sep 17;12:726935. doi: 10.3389/fmicb.2021.726935 (PMC8485067; doi:10.3389/fmicb.2021.726935)
Supplement: Supplementary file 1 [file Table_1.XLSX]

## Sheet: Sheet1
	df	Hypha diameter		Mycelia biomass
		F	P	F	P
Strain(S)	1	34.4796	1.31646e-07	28.6537	1.04013e-06
Culture conditions (C)	1	97.4231	6.85602e-15	1152.16	3.3054e-45
Treatments(T)	4	29.1107	2.94027e-14	51.5715	3.66739e-20
S*T	4	6.28963	0.000220614	0.935521	0.448566
S*C	1	23.9185	6.17742e-06	24.4796	4.97594e-06
T*C	4	47.9393	2.38514e-19	36.6424	1.67874e-16
S*T*C	4	30.3407	1.19907e-14	0.825931	0.513103
